# Supplementary material
Source: publisher figshare collection journal article supplement (https://tandf.figshare.com/ndownloader/files/16459613)
Supplement: Supplementary file 1 [file 16459613]

**Supplementary figure**





Figure S1. Total bacterial count of five groups of sausages during processing.

Figura S1. Recuento total de bacterias en cinco grupos de salchichas durante el procesamiento.





Figure S2. The pH of five groups of sausages during processing.

Figura S2. pH de cinco grupos de salchichas durante el procesamiento.
